# Supplementary material for: Semiconductor-to-metal reconstructive phase transition and superconductivity of anti-perovskite Ca3PN under hydrostatic pressure
Source: Royal Society of Chemistry journal article supplement (doi:10.1039/d0tc02507k), 2020-01-01
Supplement: d0tc02507k1.pdf [file d0tc02507k1.pdf]

Electronic Supplementary Information for  
“ Semiconductor-to-Metal Reconstructive Phase  
Transition and Superconductivity of Anti-perovskite  
 $\text{Ca}_3\text{PN}$  under Hydrostatic Pressure”

Hao Cheng,<sup>1</sup> Ai-Jie Mao,<sup>1</sup> Si-Min Yang,<sup>1</sup> Hao Tian,<sup>2,3,4,\*</sup> Si-Yu Jin,<sup>1</sup> Miao Yu,<sup>1</sup> and  
Xiao-Yu Kuang<sup>1,\*</sup>

<sup>1</sup> *Institute of Atomic and Molecular Physics, Sichuan University, Chengdu 610065,  
China*

<sup>2</sup> *National Laboratory of Solid State Microstructures and Collaborative Innovation  
Center of Advanced Microstructures,  
Department of Materials Science and Engineering, Nanjing University, Nanjing  
210093, China*

<sup>3</sup> *Jiangsu Key Laboratory of Artificial Functional Materials, Nanjing University,  
Nanjing 210093, China*

<sup>4</sup> *School of Physics and Electronic Engineering, Zhengzhou Normal University,  
Zhengzhou 450044, China*

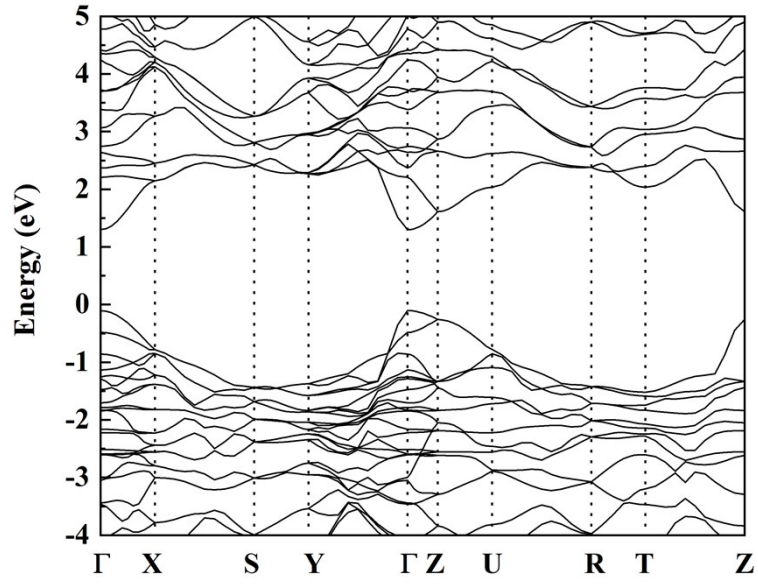

FIG. S1: Band structures of Ca<sub>3</sub>PN ppPv-*Pnma* at 30 GPa (Using HSE06 method).

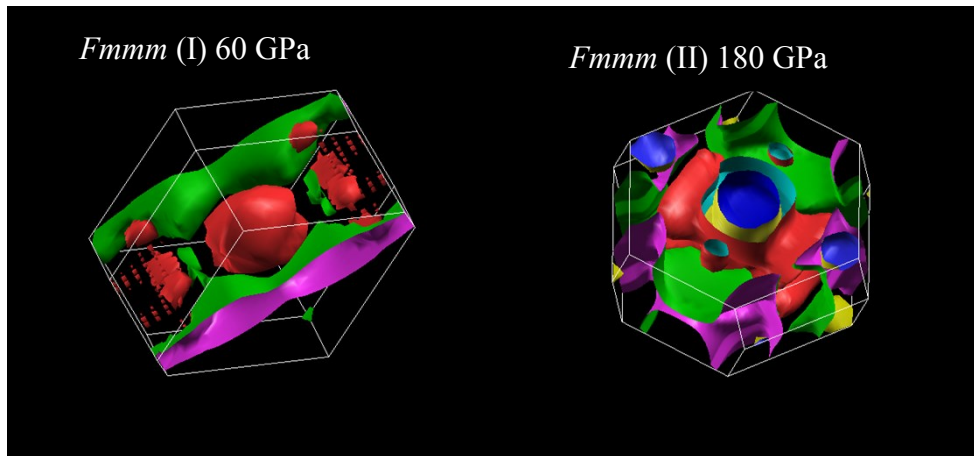

FIG. S2: The 3D Fermi surface of two  $\text{Ca}_3\text{PN}$   $Fm\bar{3}m$  phases.

**Table S1.** The relaxed lattice parameters and reduced atomic coordinates of  $\text{Ca}_3\text{PN}$  ( $\text{Pv-Pnma}$ ,  $\text{ppPv-Pnma}$ ,  $Fmmm$  (I),  $Fmmm$  (II) and  $\text{ppPv-Cmcm}$ ).

|                                             | <i>Atoms</i>                                                     | <i>Wykc.</i> | <i>Coordinates</i> |          |          |
|---------------------------------------------|------------------------------------------------------------------|--------------|--------------------|----------|----------|
|                                             |                                                                  |              | <i>x</i>           | <i>y</i> | <i>z</i> |
| <b><i>Pv-Pnma</i></b><br><b>(0 GPa)</b>     | $a=6.7564\text{\AA}, b=9.4482\text{\AA}, c=6.6398\text{\AA}$     |              |                    |          |          |
|                                             | Ca1                                                              | 8d           | 0.29296            | 0.5368   | 0.70673  |
|                                             | P                                                                | 4c           | 0.95832            | 0.25     | 0.00863  |
|                                             | Ca2                                                              | 4c           | 0.52078            | 0.25     | 0.93027  |
|                                             | N                                                                | 4b           | 0                  | 0        | 0.5      |
| <b><i>ppPv-Pnma</i></b><br><b>(30 GPa)</b>  | $a=6.7884\text{\AA}, b=3.7104\text{\AA}, c=12.2239\text{\AA}$    |              |                    |          |          |
|                                             | P                                                                | 4c           | 0.5867             | 0.25     | 0.83287  |
|                                             | N                                                                | 4c           | 0.35446            | 0.25     | 0.432    |
|                                             | Ca1                                                              | 4c           | 0.32523            | 0.25     | 0.00539  |
|                                             | Ca2                                                              | 4c           | 0.97332            | 0.25     | 0.89069  |
|                                             | Ca3                                                              | 4c           | 0.68796            | 0.25     | 0.22055  |
| <b><i>Fmmm</i> (I)</b><br><b>(60 GPa)</b>   | $a=5.6477\text{\AA}, b=12.0310\text{\AA}, c=7.2197\text{\AA}$    |              |                    |          |          |
|                                             | P                                                                | 8g           | 0.19823            | 0        | 0        |
|                                             | N                                                                | 8f           | 0.75               | 0.75     | 0.75     |
|                                             | Ca1                                                              | 16m          | 0.5                | 0.89431  | 0.79475  |
|                                             | Ca2                                                              | 8h           | 0.5                | 0.70833  | 0        |
| <b><i>Fmmm</i> (II)</b><br><b>(180 GPa)</b> | $a=3.8106\text{\AA}, b=14.0863\text{\AA}, c=6.5346\text{\AA}$    |              |                    |          |          |
|                                             | P                                                                | 8h           | 0                  | 0.92045  | 0        |
|                                             | N                                                                | 8h           | 0                  | 0.19696  | 0        |
|                                             | Ca1                                                              | 8i           | 0                  | 0        | 0.33463  |
|                                             | Ca2                                                              | 16m          | 0.5                | 0.1727   | 0.83436  |
| <b><i>ppPv-Cmcm</i></b><br><b>(90 GPa)</b>  | $a=3.37500\text{\AA}, b=13.34940\text{\AA}, c=4.85650\text{\AA}$ |              |                    |          |          |
|                                             | P                                                                | 4c           | -0.5               | 0.50473  | -0.75    |
|                                             | N                                                                | 4c           | 0                  | 0.20438  | -0.25    |
|                                             | Ca1                                                              | 4c           | 0                  | -0.20532 | -0.25    |
|                                             | Ca2                                                              | 8f           | 0                  | 0.60934  | -0.01703 |

**Table S2. Formation enthalpies (eV/f.u.) of Ca<sub>3</sub>PN at different pressures.**

|                                   | $H_{Ca_3PN}$ | $H_{CaP}$ | $H_{Ca_2N}$ | $\Delta H$ |
|-----------------------------------|--------------|-----------|-------------|------------|
| <b>Pv (0 GPa)</b>                 | -24.7973     | -9.5229   | -14.4676    | -0.8068    |
| <b>ppPv (30 GPa)</b>              | -8.0547      | -1.9108   | -3.8303     | -2.3136    |
| <b><i>Fmmm</i> (I) (60 GPa)</b>   | 4.8454       | 4.1933    | 2.6900      | -2.0379    |
| <b><i>Fmmm</i> (II) (180 GPa)</b> | 43.7269      | 20.3332   | 25.6861     | -2.2924    |

**Table S3.** The phonon frequencies ( $\text{cm}^{-1}$ ) of four phases in  $\text{Ca}_3\text{PN}$ .

| Mode               | Pv- <i>Pnma</i><br>(0GPa) | ppPv- <i>Pnma</i><br>(30GPa) | <i>Fmmm(I)</i><br>(60GPa) | <i>Fmmm(II)</i><br>(180GPa) |
|--------------------|---------------------------|------------------------------|---------------------------|-----------------------------|
| $A_g(\text{R})$    | 75.7                      | 97.8                         | 214.0                     | 461.3                       |
|                    | 97.3                      | 168.3                        | 323.5                     | 565.0                       |
|                    | 139.0                     | 179.1                        | 399.9                     | 585.0                       |
|                    | 181.2                     | 241.1                        | 532.6                     | 630.1                       |
|                    | 193.7                     | 276.8                        |                           | 1009.7                      |
|                    | 213.2                     | 327.6                        |                           |                             |
|                    | 225.6                     | 334.9                        |                           |                             |
|                    |                           | 376.7                        |                           |                             |
|                    | 441.7                     |                              |                           |                             |
|                    | 572.4                     |                              |                           |                             |
| $B_{1g}(\text{R})$ | 92.0                      | 132.2                        | 206.8                     | 215.3                       |
|                    | 136.1                     | 217.5                        | 267.1                     | 495.6                       |
|                    | 190.3                     | 236.3                        | 335.8                     | 727.3                       |
|                    | 210.9                     | 315.4                        | 414.8                     |                             |
|                    | 289.7                     | 502.2                        |                           |                             |
| $B_{2g}(\text{R})$ | 88.7                      | 139.7                        | 261.3                     | 552.0                       |
|                    | 137.0                     | 193.2                        | 450.8                     | 596.3                       |
|                    | 175.7                     | 224.1                        | 556.8                     |                             |
|                    | 206.3                     | 239.6                        |                           |                             |
|                    | 225.5                     | 294.0                        |                           |                             |
|                    | 264.8                     | 328.6                        |                           |                             |
|                    | 313.6                     | 367.5                        |                           |                             |
|                    |                           | 394.3                        |                           |                             |
|                    | 451.0                     |                              |                           |                             |
|                    | 584.6                     |                              |                           |                             |
| $B_{3g}(\text{R})$ | 137.9                     | 213.5                        | 181.4                     | 216.0                       |
|                    | 195.7                     | 225.5                        | 260.9                     | 284.5                       |
|                    | 196.7                     | 230.6                        | 366.6                     | 381.3                       |
|                    | 220.2                     | 297.0                        | 699.8                     | 516.6                       |
|                    | 337.8                     | 500.7                        |                           | 682.9                       |
| $A_u$              | 87.2                      | 121.5                        | 331.3                     | 597.9                       |
|                    | 120.1                     | 202.2                        |                           |                             |
|                    | 184.6                     | 237.3                        |                           |                             |
|                    | 205.0                     | 286.1                        |                           |                             |
|                    | 243.3                     | 475.5                        |                           |                             |
|                    | 326.0                     |                              |                           |                             |
|                    | 347.0                     |                              |                           |                             |
| 415.4              |                           |                              |                           |                             |
| $B_{1u}$           | 117.5                     | 104.3                        | 264.5                     | 244.5                       |
|                    | 136.8                     | 186.0                        | 367.5                     | 303.8                       |

|                 |       |       |       |       |
|-----------------|-------|-------|-------|-------|
|                 | 162.7 | 230.7 | 452.3 | 554.3 |
|                 | 188.3 | 323.0 | 483.2 | 697.3 |
|                 | 223.3 | 333.3 |       |       |
|                 | 259.0 | 358.1 |       |       |
|                 | 321.1 | 368.1 |       |       |
|                 | 406.8 | 450.4 |       |       |
|                 | 431.0 | 517.7 |       |       |
| <hr/>           |       |       |       |       |
| B <sub>2u</sub> | 95.9  | 180.9 | 306.0 | 440.9 |
|                 | 174.6 | 219.7 | 344.8 | 516.0 |
|                 | 235.8 | 265.9 | 385.1 | 626.5 |
|                 | 252.8 | 475.9 | 593.5 | 950.3 |
|                 | 322.6 |       |       |       |
|                 | 347.4 |       |       |       |
|                 | 415.8 |       |       |       |
| <hr/>           |       |       |       |       |
| B <sub>3u</sub> | 119.8 | 158.5 | 139.6 | 245.2 |
|                 | 144.4 | 194.0 | 379.5 | 524.3 |
|                 | 172.0 | 201.1 | 490.3 | 635.6 |
|                 | 186.0 | 224.1 |       |       |
|                 | 229.0 | 312.3 |       |       |
|                 | 251.0 | 360.0 |       |       |
|                 | 323.8 | 367.2 |       |       |
|                 | 409.2 | 428.4 |       |       |
|                 | 475.8 | 603.2 |       |       |
| <hr/>           |       |       |       |       |

**Table S4. Elastic constants of Ca<sub>3</sub>PN for the Pv-*Pnma*, ppPv-*Pnma*, *Fmmm* (I), and *Fmmm* (II) phases at different pressures.**

|                         | P   | C <sub>11</sub> | C <sub>22</sub> | C <sub>33</sub> | C <sub>44</sub> | C <sub>55</sub> | C <sub>66</sub> | C <sub>12</sub> | C <sub>13</sub> | C <sub>23</sub> |
|-------------------------|-----|-----------------|-----------------|-----------------|-----------------|-----------------|-----------------|-----------------|-----------------|-----------------|
| <b><i>Pv-Pnma</i></b>   | 0   | 101             | 127             | 110             | 45              | 43              | 49              | 32              | 41              | 38              |
|                         | 5   | 121             | 159             | 126             | 49              | 52              | 53              | 39              | 56              | 50              |
|                         | 10  | 139             | 185             | 141             | 53              | 59              | 55              | 46              | 70              | 62              |
|                         | 15  | 157             | 206             | 153             | 55              | 64              | 57              | 54              | 82              | 76              |
| <b>ppPv-<i>Pnma</i></b> | 20  | 146             | 185             | 182             | 78              | 62              | 76              | 94              | 64              | 80              |
|                         | 25  | 155             | 197             | 194             | 83              | 66              | 83              | 107             | 73              | 92              |
|                         | 30  | 161             | 209             | 204             | 88              | 69              | 90              | 120             | 83              | 103             |
|                         | 35  | 166             | 220             | 212             | 93              | 72              | 97              | 131             | 94              | 115             |
|                         | 40  | 168             | 231             | 219             | 98              | 74              | 104             | 142             | 106             | 126             |
| <b><i>Fmmm</i>(I)</b>   | 50  | 391             | 288             | 281             | 111             | 111             | 113             | 101             | 100             | 134             |
|                         | 60  | 429             | 319             | 303             | 119             | 130             | 128             | 117             | 121             | 149             |
|                         | 70  | 467             | 351             | 324             | 126             | 148             | 143             | 132             | 141             | 162             |
|                         | 80  | 506             | 384             | 350             | 133             | 166             | 158             | 146             | 158             | 178             |
|                         | 90  | 542             | 416             | 375             | 140             | 183             | 172             | 161             | 177             | 194             |
|                         | 100 | 576             | 449             | 384             | 147             | 199             | 186             | 176             | 202             | 203             |
|                         | 110 | 614             | 481             | 411             | 154             | 215             | 199             | 191             | 215             | 218             |
|                         | 120 | 648             | 515             | 458             | 163             | 229             | 212             | 205             | 225             | 236             |
|                         | 130 | 680             | 546             | 495             | 171             | 243             | 224             | 220             | 236             | 252             |
|                         | 140 | 708             | 577             | 518             | 179             | 257             | 236             | 235             | 256             | 263             |
|                         | 150 | 738             | 607             | 554             | 188             | 270             | 248             | 250             | 269             | 277             |
| 160                     | 766 | 637             | 589             | 196             | 283             | 259             | 264             | 281             | 291             |                 |
| <b><i>Fmmm</i>(II)</b>  | 170 | 869             | 749             | 902             | 236             | 198             | 250             | 178             | 342             | 224             |
|                         | 180 | 909             | 778             | 940             | 245             | 210             | 258             | 185             | 357             | 236             |
|                         | 190 | 947             | 807             | 978             | 253             | 221             | 265             | 191             | 373             | 249             |
|                         | 200 | 985             | 836             | 1015            | 261             | 232             | 272             | 199             | 389             | 259             |



**Table S5. The Voigt bulk modulus, Reuss bulk modulus, Voigt shear modulus, Reuss shear modulus of  $\text{Ca}_3\text{PN}$  for the  $\text{Pv-Pnma}$ ,  $\text{ppPv-Pnma}$ ,  $\text{Fmmm (I)}$ , and  $\text{Fmmm (II)}$  phases at different pressures.**

|                         | <b>P</b> | $B_v$    | $B_r$    | $G_v$    | $G_r$    |
|-------------------------|----------|----------|----------|----------|----------|
| <b><i>Pv-Pnma</i></b>   | 0        | 62.1494  | 61.7592  | 42.4223  | 41.5620  |
|                         | 5        | 77.3088  | 76.7236  | 48.2357  | 46.6659  |
|                         | 10       | 91.2639  | 90.5443  | 52.4773  | 50.1739  |
|                         | 15       | 104.3417 | 103.5476 | 55.4627  | 52.5131  |
| <b><i>ppPv-Pnma</i></b> | 20       | 109.9163 | 107.5463 | 61.4783  | 56.4253  |
|                         | 25       | 121.0662 | 118.1087 | 64.7465  | 57.7387  |
|                         | 30       | 131.7292 | 127.9249 | 67.4405  | 58.1206  |
|                         | 35       | 141.9838 | 136.9190 | 69.6076  | 57.4839  |
|                         | 40       | 151.8646 | 144.9596 | 71.3392  | 55.7940  |
| <b><i>Fmmm(I)</i></b>   | 50       | 181.3434 | 179.8474 | 108.4978 | 104.5642 |
|                         | 60       | 202.8199 | 200.6762 | 119.6539 | 114.9968 |
|                         | 70       | 223.6152 | 220.7601 | 130.4497 | 124.9768 |
|                         | 80       | 244.9733 | 241.7759 | 141.7971 | 135.2059 |
|                         | 90       | 266.1887 | 262.5736 | 152.3798 | 144.5767 |
|                         | 100      | 285.6484 | 280.1527 | 161.4398 | 152.0826 |
|                         | 110      | 305.9510 | 300.1304 | 172.3914 | 162.2592 |
|                         | 120      | 328.2302 | 323.9471 | 184.4846 | 175.0176 |
|                         | 130      | 348.5584 | 344.7922 | 195.3277 | 185.9155 |
|                         | 140      | 367.9347 | 363.7754 | 204.4204 | 194.5618 |
|                         | 150      | 387.7927 | 384.1335 | 214.6286 | 204.9246 |
| <b><i>Fmmm(II)</i></b>  | 160      | 407.2477 | 404.0118 | 224.6521 | 215.1065 |
|                         | 170      | 445.3408 | 435.7197 | 255.4323 | 248.2075 |
|                         | 180      | 464.8285 | 454.4205 | 265.8257 | 258.5963 |
|                         | 190      | 484.1467 | 472.9512 | 275.8415 | 268.5688 |
|                         | 200      | 503.2239 | 491.3199 | 285.5620 | 278.2219 |

**Table S6. The Bulk modulus, Shear modulus, Young's modulus, Poisson's ratio of Ca<sub>3</sub>PN for the Pv-*Pnma*, ppPv-*Pnma*, *Fmmm* (I), and *Fmmm* (II) phases at different pressures.**

|                         | <b>P</b> | <b>B</b> | <b>G</b> | <b>B/G</b> | <b>Y</b> | <b>σ</b> |
|-------------------------|----------|----------|----------|------------|----------|----------|
| <b>Pv-<i>Pnma</i></b>   | 0        | 61.9543  | 41.9921  | 1.4754     | 102.7598 | 0.2236   |
|                         | 5        | 77.0162  | 47.4508  | 1.6231     | 118.0984 | 0.2444   |
|                         | 10       | 90.9041  | 51.3256  | 1.7711     | 129.5878 | 0.2624   |
|                         | 15       | 103.9446 | 53.9879  | 1.9253     | 138.0612 | 0.2786   |
| <b>ppPv-<i>Pnma</i></b> | 20       | 108.7313 | 58.9518  | 1.8444     | 149.7852 | 0.2704   |
|                         | 25       | 119.5875 | 61.2426  | 1.9527     | 156.9378 | 0.2813   |
|                         | 30       | 129.8270 | 62.7805  | 2.0680     | 162.1970 | 0.2918   |
|                         | 35       | 139.4514 | 63.5458  | 2.1945     | 165.4989 | 0.3022   |
|                         | 40       | 148.4121 | 63.5666  | 2.3347     | 166.8750 | 0.3126   |
| <b><i>Fmmm</i>(I)</b>   | 50       | 180.5954 | 106.5310 | 1.6952     | 267.0777 | 0.2535   |
|                         | 60       | 201.7481 | 117.3254 | 1.7196     | 294.8249 | 0.2564   |
|                         | 70       | 222.1877 | 127.7133 | 1.7397     | 321.5340 | 0.2588   |
|                         | 80       | 243.3746 | 138.5015 | 1.7572     | 349.2527 | 0.2608   |
|                         | 90       | 264.3812 | 148.4782 | 1.7806     | 375.1970 | 0.2635   |
|                         | 100      | 282.9006 | 156.7612 | 1.8047     | 396.9619 | 0.2661   |
|                         | 110      | 303.0407 | 167.3253 | 1.8111     | 423.9477 | 0.2668   |
|                         | 120      | 326.0887 | 179.7511 | 1.8141     | 455.5487 | 0.2672   |
|                         | 130      | 346.6753 | 190.6216 | 1.8187     | 483.2857 | 0.2677   |
|                         | 140      | 365.8550 | 199.4911 | 1.8339     | 506.4264 | 0.2693   |
|                         | 150      | 385.9631 | 209.7766 | 1.8399     | 532.8013 | 0.2699   |
| 160                     | 405.6297 | 219.8793 | 1.8448   | 558.6887   | 0.2704   |          |
| <b><i>Fmmm</i>(II)</b>  | 170      | 440.5303 | 251.8199 | 1.7494     | 634.5505 | 0.2599   |
|                         | 180      | 459.6245 | 262.2110 | 1.7529     | 660.9455 | 0.2603   |
|                         | 190      | 478.5489 | 272.2052 | 1.7580     | 686.4596 | 0.2609   |
|                         | 200      | 497.2719 | 281.8920 | 1.7641     | 711.2742 | 0.2616   |

Table S7. The calculated bond number  $n$ , bond length  $d$ , bond volume  $V_b$ , Mulliken overlap population  $P$  and Vickers hardness (GPa)  $H$  of  $\text{Ca}_3\text{PN}$  for the  $Pv\text{-}Pnma$ ,  $ppPv\text{-}Pnma$ ,  $Fmmm$  (I), and  $Fmmm$  (II) phases at different pressures.

|                                                   | $n$                                      | $Bond$ | $d$  | $V_b$ | $P$  | $H_n$ | $H$  |
|---------------------------------------------------|------------------------------------------|--------|------|-------|------|-------|------|
| <b><math>Pv\text{-}Pnma</math><br/>(0 GPa)</b>    | 4                                        | Ca-N   | 2.41 | 4.56  | 0.25 | 14.78 | 6.02 |
|                                                   | 4                                        | Ca-N   | 2.41 | 4.56  | 0.25 | 14.78 |      |
|                                                   | 4                                        | Ca-P   | 2.95 | 8.30  | 0.30 | 6.52  |      |
|                                                   | 4                                        | Ca-P   | 3.00 | 8.79  | 0.27 | 5.33  |      |
|                                                   | 8                                        | 2Ca-N  | 2.42 | 4.62  | 0.24 | 13.84 |      |
|                                                   | 8                                        | 2Ca-N  | 2.43 | 4.69  | 0.24 | 13.53 |      |
|                                                   | 8                                        | 2Ca-P  | 2.94 | 8.22  | 0.23 | 5.09  |      |
|                                                   | 8                                        | 2Ca-P  | 3.24 | 11.08 | 0.14 | 1.88  |      |
|                                                   | 8                                        | 2Ca-P  | 3.26 | 11.27 | 0.14 | 1.83  |      |
| <b><math>ppPv\text{-}Pnma</math><br/>(30 GPa)</b> | 4                                        | Ca-N   | 2.18 | 4.58  | 0.32 | 18.76 | 6.70 |
|                                                   | 4                                        | Ca-N   | 2.25 | 5.03  | 0.49 | 24.54 |      |
|                                                   | 4                                        | Ca-N   | 2.31 | 5.46  | 0.18 | 7.86  |      |
|                                                   | 4                                        | Ca-N   | 2.39 | 6.06  | 0.42 | 15.41 |      |
|                                                   | 4                                        | Ca-P   | 2.71 | 8.79  | 0.33 | 6.52  |      |
|                                                   | 4                                        | Ca-P   | 2.72 | 8.87  | 0.17 | 3.31  |      |
|                                                   | 4                                        | Ca-P   | 2.76 | 9.25  | 0.23 | 4.18  |      |
|                                                   | 4                                        | Ca-P   | 2.77 | 9.37  | 0.34 | 6.04  |      |
|                                                   | 4                                        | Ca-P   | 2.78 | 9.45  | 0.34 | 5.96  |      |
|                                                   | 4                                        | Ca-P   | 2.84 | 10.11 | 0.14 | 2.19  |      |
|                                                   | <b><math>Fmmm</math>(I)<br/>(60 GPa)</b> | 1      | P-P  | 2.24  | 4.34 | 0.25  |      |
| 8                                                 |                                          | Ca-N   | 2.26 | 4.47  | 0.17 | 10.37 |      |
| 4                                                 |                                          | Ca-N   | 2.35 | 4.99  | 0.31 | 15.73 |      |
| 8                                                 |                                          | Ca-P   | 2.59 | 6.73  | 0.17 | 5.24  |      |
| 1                                                 |                                          | N-N    | 2.82 | 8.71  | 0.11 | 2.21  |      |
| <b><math>Fmmm</math>(II)<br/>(180 GPa)</b>        | 2                                        | N-P    | 1.65 | 2.99  | 0.18 | 21.48 | 5.71 |
|                                                   | 4                                        | Ca-N   | 2.21 | 7.15  | 0.23 | 6.42  |      |
|                                                   | 1                                        | N-N    | 2.42 | 9.38  | 0.22 | 3.90  |      |
|                                                   | 4                                        | Ca-P   | 2.55 | 10.94 | 0.21 | 2.88  |      |
